# Supplementary material for: Social, institutional and political dynamics of reporting maternal deaths in multiple systems in Tanzania
Source: Research Square preprint supplement (doi:10.21203/rs.3.rs-6862631/v1), 2025-07-28
Supplement: Supplementary file 1 [file cfc2405125cc90c60cbb2290.docx]

**Key informants and FGD guide**

**Demographic characteristic**

|  | Variable | 1 | 2 | 3 | 4 |  |  |
| --- | --- | --- | --- | --- | --- | --- | --- |
| 1 | Sex |  |  |  |  |  |  |
|  | 1. Male |  |  |  |  |  |  |
|  | 1. Female |  |  |  |  |  |  |
| 2 | Age group |  |  |  |  |  |  |
|  | 20-30 |  |  |  |  |  |  |
|  | 31-40 |  |  |  |  |  |  |
|  | 41 and above |  |  |  |  |  |  |
| 3 | Education level |  |  |  |  |  |  |
|  | Primary |  |  |  |  |  |  |
|  | Secondary |  |  |  |  |  |  |
|  | College/university |  |  |  |  |  |  |
| 4 | Profession |  |  |  |  |  |  |
|  | Specialist doctor |  |  |  |  |  |  |
|  | Medical doctor |  |  |  |  |  |  |
|  | Midwife/Nurse |  |  |  |  |  |  |
|  | IT specialist |  |  |  |  |  |  |
|  | M&E specialist |  |  |  |  |  |  |
|  | Other;…………………………..  ……………………………………..  …………………………………….. |  |  |  |  |  |  |
| 5 | Which system do you work at? | | |  |  |  |  |
|  | DHIS2 |  |  |  |  |  |  |
|  | MPDSR |  |  |  |  |  |  |
|  | IDSR |  |  |  |  |  |  |
|  | CRVS |  |  |  |  |  |  |
|  | Others: ………………………..  ……………………………………..  ……………………………………..  …………………………………….. |  |  |  |  |  |  |
| 6 | Which level of the system do you work? | | | |  |  |  |
|  | National |  |  |  |  |  |  |
|  | Regional |  |  |  |  |  |  |
|  | District |  |  |  |  |  |  |
|  | Facility |  |  |  |  |  |  |
|  | Community |  |  |  |  |  |  |
| 7 | How many years have you worked in the system? | | | | |  |  |
|  |  |  |  |  |  |  |  |
| 9 | Have you worked in any other death reporting system? | | | | | |  |
|  | Yes |  |  |  |  |  |  |
|  | No |  |  |  |  |  |  |
| 10 | If yes mention the system | |  |  |  |  |  |
|  |  |  |  |  |  |  |  |
| 11 | Have you been trained on the work you are doing in maternal death reporting? | | | | | | |
|  | Yes |  |  |  |  |  |  |
|  | No |  |  |  |  |  |  |

**Interview Guide**

1. Let’s start our discussion by you describing to me, what this system (mention system) is and how it was initialized.

Potential probes:

- Where is it based?
- Aims of the system?
- Functions / daily activities

1. One of the functions of this system is identification and reporting of health facility and community maternal deaths (MD); Please explain to me how MD are identified by the system.

Potential probes: community and facility deaths:

- Definitions
- How does cause of MD relate to reporting of MD? (Ask more concretely how the cause of death is also captured in the system)
- How are deaths confirmed to be maternal or not?
- How about suspected maternal death?
- Who identifies a MD and how?
- From where are maternal death identified? When?

1. Please explain further about how community MD are reported?

Potential probes:

- Who reports, how and where?
- Geographically how far does the system reach?
- Probe for tools used for reporting community MD?
- When are they reported after occurrence?
- What is the timing of report from community level to higher level?
- What facilitates identification of community MD?
- What hinders identification of community MD?

1. Let’s discuss further the issue of quality of MD data reported

- What do you do to make sure the quality of data is upheld?
- What is your confidence in data quality?
- What about issues affecting data quality (resources, personnel, training, technology, traditions, blame)
- How do policies put in place affect maternal death data quality?
- How about politicization of MD? How does that affect data quality?
- What are you doing to make sure maternal death data are true?

1. Please explain to me how this organization uses the MD data collected?

Potential probes:

- What about the use of community MD data?
- In what ways are MD data used in decision making, planning, resource allocation etc.? In what ways may the data be used?
- What other organization(s) use(s) community maternal death data from this institution/section? (if any)
- How do other organization access the data?

1. To the management of the system, especially when it comes to community maternal death reporting.

- How is the management of the organization involved in community maternal death reporting?

Potential probes:

- Reports sent, feedback received?

Effort to upheld data quality

- - supervision, follow up, training
  - provision of required resources
- How does management at this level of affect positively or negatively the identification and reporting of community MD?

1. Let’s talk about how you as an employee (at XX) are involved in MD reporting in general (with a key focus on community MD)

Potential probes:

- The specific activities conducted in the system by the respondent
- What kind of training has he/she received to facilitate identification and reporting of community maternal deaths?
- Facilitating factors for him/her to conduct her daily activities
- What hinders her/his activities in identification of community deaths?
- How has politicization of maternal death affected his/her work
- How about the issue of blame?

1. Please tell me what do you know about other systems that identify and report MD, particularly pertaining to both facility and community maternal deaths

Potential probes:

- How do you work with these other systems? How are you positioned and trained to work with other reporting systems.
- How has that improved / negatively affected your work?
- What challenges are there in working with these other systems?

1. Let’s finish our discussion: what do you think should be done to make these reporting systems more effective in correctly identifying and reporting facility and community maternal deaths

Potential probes:

- What do you think there is a potential for integrating these systems to enhance efficiency /avoid redundance?
- Any thoughts as to how such integration be done?
- Where, when, how?

Thank you very much for sharing your very useful knowledge!
